# Supplementary material for: Bio-AgNPs-based electrochemical nanosensors for the sensitive determination of 4-nitrophenol in tomato samples: the roles of natural plant extracts in physicochemical parameters and sensing performance
Source: PubMed Central journal article supplement — RSC Adv. 2022 Feb 18;12(10):6007–17. doi: 10.1039/d1ra09202b (PMC8981731; doi:10.1039/d1ra09202b), 2022-02-18
Supplement: RA-012-D1RA09202B-s001.pdf [file RA-012-D1RA09202B-s001.pdf]

## Supporting information

### **Bio-AgNPs-based electrochemical nanosensor for sensitive determination of 4-nitrophenol in tomato samples: Role of natural plant extracts on physicochemical parameters and sensing performance**

Nguyen Le Nhat Trang<sup>a,1</sup>, Dao Thi Nguyet Nga<sup>a,1</sup>, Van-Tuan Hoang<sup>a,\*</sup>, Xuan-Dinh Ngo<sup>a</sup>,  
Pham Tuyet Nhung<sup>a</sup>, Anh-Tuan Le<sup>a,b\*\*</sup>

<sup>a</sup> Phenikaa University Nano Institute (PHENA), PHENIKAA University, Hanoi 12116,  
Vietnam

<sup>b</sup> Faculty of Materials Science and Engineering (MSE), PHENIKAA University, Hanoi  
12116, Vietnam

Corresponding authors:

\*[tuan.hoangvan@phenikaa-uni.edu.vn](mailto:tuan.hoangvan@phenikaa-uni.edu.vn) (V.T. Hoang)

\*\*[tuan.leanh@phenikaa-uni.edu.vn](mailto:tuan.leanh@phenikaa-uni.edu.vn) (A.T.Le)

<sup>1</sup>N.L.N. Trang and D.T.N. Nga contributed equally to this work

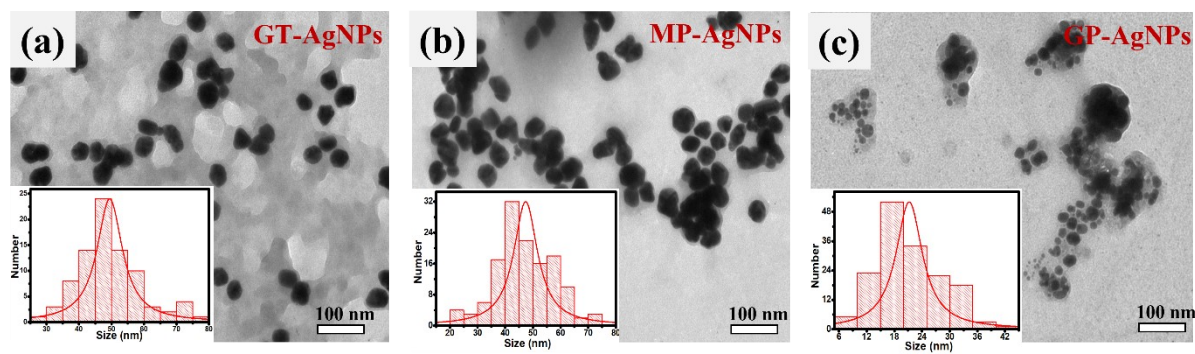

**Figure S1:** TEM image of bio-AgNPs synthesized using different extracts, (a) GT-AgNPs ; (b) MP-AgNPs ; (c) GP-AgNPs

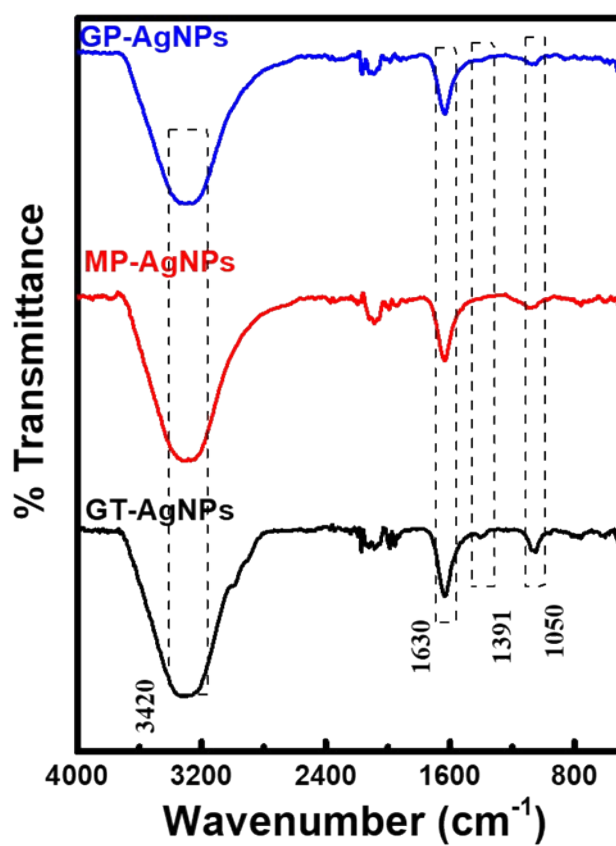

**Figure S2:** FTIR spectrum of of GT-AgNPs; MP-AgNPs; GP-AgNPs, respectively

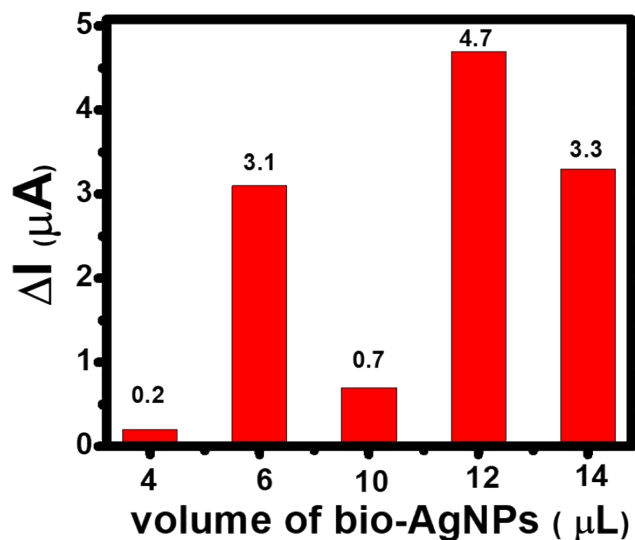

**Figure S3:** Effect of modifier amounts on the MP-AgNPs/SPE towards 4-NP detection

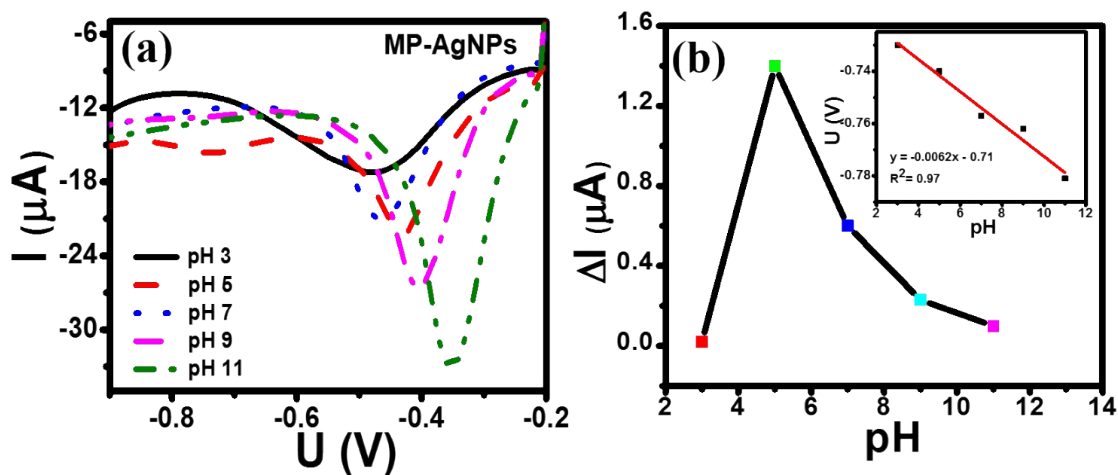

**Figure S4:** (a) DPV curves of the MP-AgNPs sample in 10 μM 4-NP at various pH values, corresponding to the plots of peak current vs. pH with error bars (b), respectively. Scan rate of 50 mV s<sup>-1</sup>

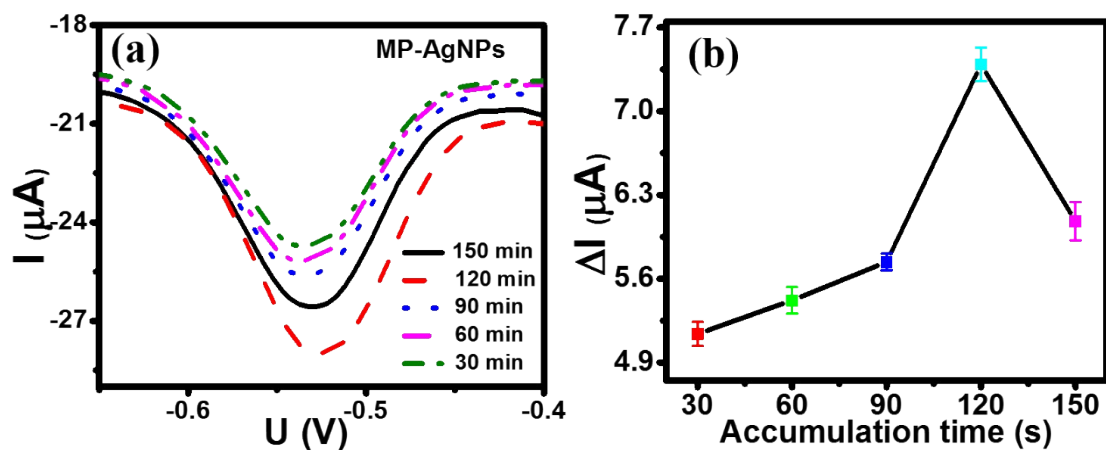

**Figure S5:** DPVs recorded on the MP-AgNPs modified electrodes with various reaction times using in 0.1M PBS (pH 5) containing 50  $\mu\text{M}$  4-NP and the plots of peak current vs. reaction time with error bars. Scan rate of 50  $\text{mV s}^{-1}$ .

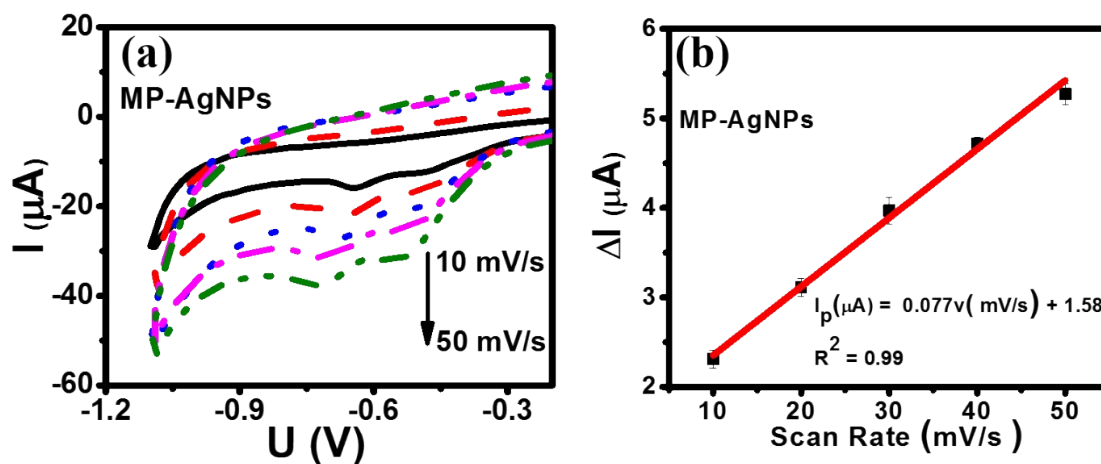

**Figure S6:** CV response recorded of 50  $\mu\text{M}$  4-NP in 0.1 M PBS (pH 5) on MP-AgNPs modified electrodes (a) with various scan rates from 10 to 50  $\text{mV s}^{-1}$ . Insert shows the corresponding calibration plots of peak current response vs. scan rate (b) with error bars

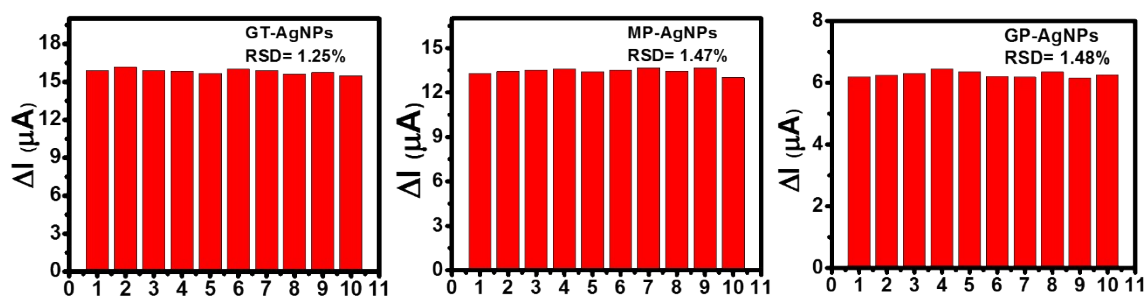

**Figure S7:** Repeatability of (a) GT-AgNPs; (b) MP-AgNPs; and (c) GP-AgNP- modified electrodes in 50  $\mu\text{M}$  4-NP using CV measurements

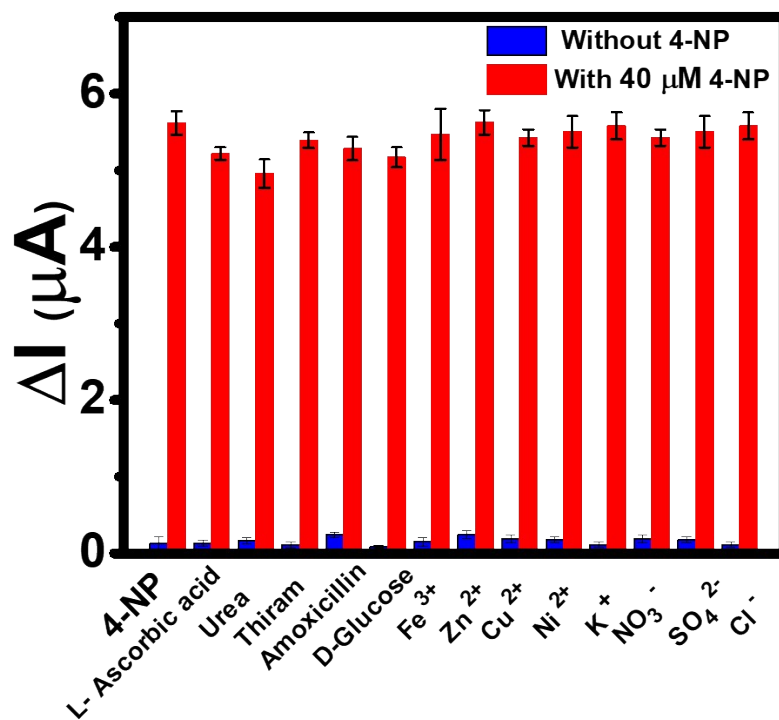

**Figure S8:** Effect of interference substances on the MP-AgNPs modified electrode in 0.1 M PBS (pH 5) containing 40 μM 4-NP along with 4-fold concentration of interference substances

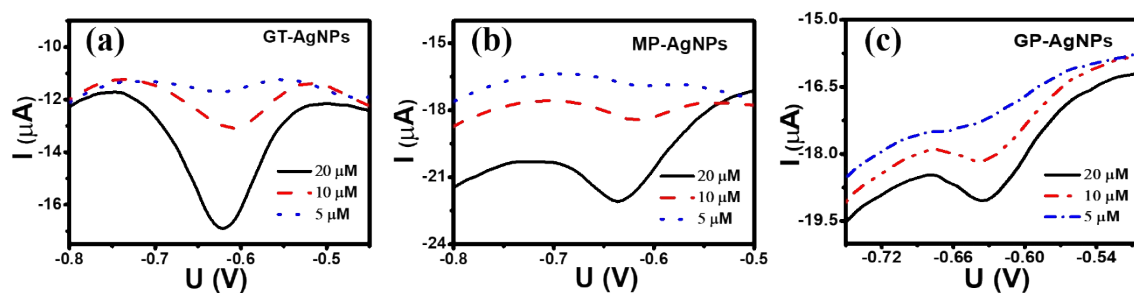

**Figure S9:** DPV curves of (a) GT-AgNPs; (b) MP-AgNPs; and (c) GP-AgNPs-modified electrodes to detect 4-NP in tomato samples
